# Supplementary material
Source: PubMed Central journal article supplement (PMC2978951)
Supplement: mmc1.pdf [file mmc1.pdf]

The American Journal of Human Genetics, Volume 87

## **Supplemental Data**

### **Prodynorphin Mutations Cause the Neurodegenerative**

### **Disorder Spinocerebellar Ataxia Type 23**

**Georgy Bakalkin, Hiroyuki Watanabe, Justyna Jezierska, Cloë Depoorter, Corien Verschuuren-Bemelmans, Igor Bazov, Konstantin A. Artemenko, Tatjana Yakovleva, Dennis Dooijes, Bart P.C. Van de Warrenburg, Roman A. Zubarev, Berry Kremer, Pamela E. Knapp, Kurt F. Hauser, Cisca Wijmenga, Fred Nyberg, Richard J. Sinke, and Dineke S. Verbeek**

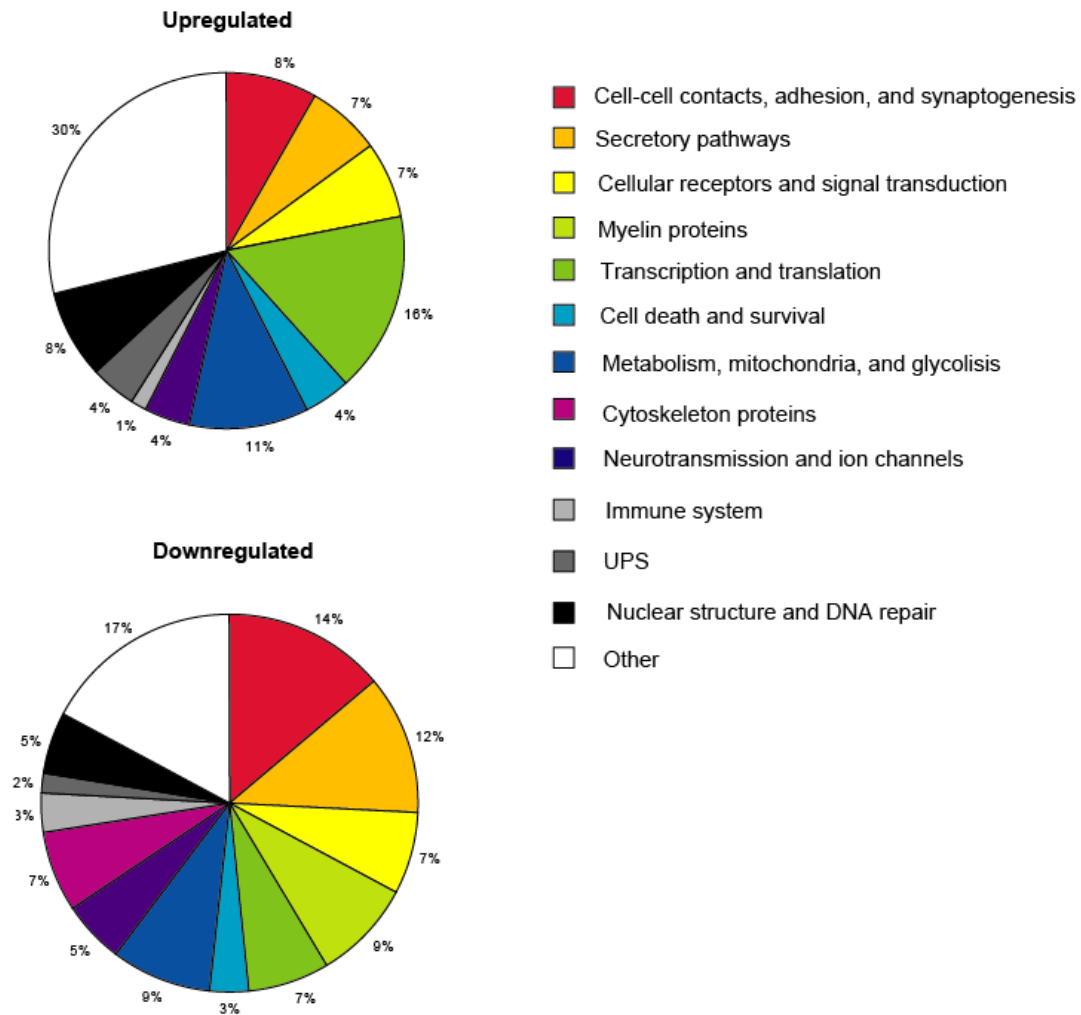

**Figure S1. Functional Categorization of Proteins that Are Up- or Downregulated in SCA23 Compared to Control Cerebellum (Shown in Table S4)**

LS-MS/MS analysis shows that proteins of several groups including those involved in cell-cell contacts, adhesion and synaptogenesis, secretory pathways (proteins of the endoplasmic reticulum, Golgi, exocytotic machinery, secretory and plasma membrane proteins), and cellular receptors and signal transduction proteins are dysregulated (up- and downregulated) in the SCA23 cerebellum compared to control cerebella. Myelin and immune proteins and those involved in neurotransmission, including ion channels and transporters, are downregulated, while the UPS proteins are predominantly upregulated in SCA subject. Protein categorization is based on web-resources [www.uniprot.org](http://www.uniprot.org) and [www.biobase-international.com](http://www.biobase-international.com).

**Table S1. Clinical Characteristics of the SCA23 Individuals with PDYN Mutations**

| Mutation          | Age of Onset (Years)    | Gait Ataxia | Limb Ataxia | Dysarthria | Oculomotor Impairment | Other                                                                                             |
|-------------------|-------------------------|-------------|-------------|------------|-----------------------|---------------------------------------------------------------------------------------------------|
| p.L211S           | 73                      | +           | +           | +/-        | +                     | Parkinson-like features: polyneuropathy and pyramidal syndrome in the legs                        |
| p.R212W           | 54                      | +           | +           | +          | -                     | Tremor of the head and upper and lower extremities                                                |
| p.R215C Patient 1 | 54<br>Clumsy as a child | ?           | +           | +          | +                     | Progressive postural tremor, slowly progressive frontoparietal white matter abnormalities on MRI. |
| p.R215C Patient 2 | 42<br>Clumsy as a child | +           | +           | +          | ?                     | Tremor of the head and arms. Discrete peri-ventricular white matter lesions.                      |

These mutations were found in four patients from a large panel of ataxia subjects (n=1100) who did not have mutations in the known SCA genes that currently are screened in diagnostic setting (SCA1-3, 6, 7, 12, 14, and 17). absent; +/- subtle; + present or mild

**Table S2. Predicted Protein Conformational Changes Due to PDYN Missense Mutations Using the PolyPhen, Sift, SNP and Align GVGD Programs**

|          |                | PolyPhen          |                    | SIFT                    |                    | SNAP        |                                | Align GVGD  |                      |
|----------|----------------|-------------------|--------------------|-------------------------|--------------------|-------------|--------------------------------|-------------|----------------------|
| Status   | Protein Change | Prediction        | Score <sup>a</sup> | Prediction              | Score <sup>b</sup> | Prediction  | Expected Accuracy <sup>c</sup> | Prediction  | C-Score <sup>d</sup> |
| Affected | p.R138S        | benign            | 1.362              | Tolerated               | 0.07               | Neutral     | 89%                            | Less likely | C15                  |
| Affected | p.L211S        | possibly damaging | 1.671              | Affect protein function | 0.00               | Non-neutral | 63%                            | Most likely | C65                  |
| Affected | p.R212W        | probably damaging | 3.143              | Affect protein function | 0.00               | Non-neutral | 82%                            | Most likely | C65                  |
| Affected | p.R215C        | probably damaging | 3.143              | Affect protein function | 0.00               | Non-neutral | 78%                            | Most likely | C65                  |

<sup>a</sup> The lower the score, the more benign the substitution, <sup>b</sup> The higher the SIFT score, the more tolerated the substitution, <sup>c</sup> The higher the percentage of accuracy, the greater the reliability for prediction, <sup>d</sup> The lower the C-score, the less likely the substitution is deleterious.

**Table S3. Phosphorylation Prediction Scores Corresponding to Identified Sequence Variants**

| Status   | Protein Change | Putative Effects                   | Putative Phosphorylation Site | Context                            | Wild Type Score     | Mutant Score                   |
|----------|----------------|------------------------------------|-------------------------------|------------------------------------|---------------------|--------------------------------|
| Affected | p.R138S        | possible increased phosphorylation | S134<br>S138<br>S143          | LRGLSDGFS<br>SDGFSEGAE<br>EGAESLMR | 0.955<br>0<br>0.906 | 0.989<br><b>0.546</b><br>0.788 |
| Affected | p.L211S        | probable increased phosphorylation | S211                          | YGGFSRRIR                          | 0                   | <b>0.729</b>                   |

Phosphorylation scores range from 0.0 (minimal probability) to 1.0 (high probability). Substitutions scores for high probability phosphorylation sites (PDYN p.R138S and p.L211S) are shown in bold.

**Table S4. List of Proteins that Are Up- or Downregulated in the SCA23 Cerebellum**

| Protein ID                                    |                                                                                                                                      | Normalisation to the sum of quantified peptide intensities <sup>1</sup> |              |                                                    | External normalization to total protein amount <sup>2</sup> |              |                                                    |
|-----------------------------------------------|--------------------------------------------------------------------------------------------------------------------------------------|-------------------------------------------------------------------------|--------------|----------------------------------------------------|-------------------------------------------------------------|--------------|----------------------------------------------------|
|                                               |                                                                                                                                      | Median Controls                                                         | Median SCA23 | log <sub>10</sub> (median samples/median controls) | Median Controls                                             | Median SCA23 | log <sub>10</sub> (median samples/median controls) |
| <b>PROTEINS UP-REGULATED IN SCA23 SUBJECT</b> |                                                                                                                                      |                                                                         |              |                                                    |                                                             |              |                                                    |
| IPI00816801                                   | Isoform 2 of DNA2-like helicase                                                                                                      | 2.26E+05                                                                | 4.71E+06     | 1.32                                               | 2.16E+05                                                    | 4.38E+06     | <b>1.31</b>                                        |
| IPI00656087                                   | Isoform 1 of Tyrosine-protein phosphatase non-receptor type substrate 1 precursor                                                    | 4.50E+05                                                                | 7.90E+06     | 1.24                                               | 4.36E+05                                                    | 6.35E+06     | <b>1.16</b>                                        |
| IPI00292496                                   | Beta-tubulin 4Q                                                                                                                      | 6.30E+06                                                                | 9.76E+07     | 1.19                                               | 5.28E+06                                                    | 1.07E+08     | <b>1.31</b>                                        |
| IPI00643452                                   | Protein                                                                                                                              | 8.29E+04                                                                | 1.28E+06     | 1.19                                               | 8.23E+04                                                    | 1.13E+06     | <b>1.14</b>                                        |
| IPI00005198                                   | Interleukin enhancer-binding factor 2                                                                                                | 5.54E+04                                                                | 7.10E+05     | 1.11                                               | 4.35E+04                                                    | 8.02E+05     | <b>1.27</b>                                        |
| IPI00018233                                   | SAM pointed domain-containing Ets transcription factor                                                                               | 9.91E+05                                                                | 1.22E+07     | 1.09                                               | 9.68E+05                                                    | 1.54E+07     | <b>1.20</b>                                        |
| IPI00456149                                   | Isoform 1 of Polypeptide N-acetylgalactosaminyltransferase 12                                                                        | 8.14E+07                                                                | 9.71E+08     | 1.08                                               | 7.86E+07                                                    | 1.00E+09     | <b>1.11</b>                                        |
| IPI00152625                                   | Isoform 1 of OTU domain-containing protein 7A                                                                                        | 4.61E+07                                                                | 4.75E+08     | 1.01                                               | 4.55E+07                                                    | 4.39E+08     | <b>0.98</b>                                        |
| IPI00030058                                   | Guanine nucleotide-binding protein G(i)/G(s)/G(o) gamma-4 subunit precursor                                                          | 1.24E+06                                                                | 1.25E+07     | 1.00                                               | 1.15E+06                                                    | 1.34E+07     | <b>1.06</b>                                        |
| IPI00658128                                   | Similar to stromal interaction molecule 2                                                                                            | 5.74E+07                                                                | 5.66E+08     | 0.99                                               | 4.59E+07                                                    | 6.00E+08     | <b>1.12</b>                                        |
| IPI00011822                                   | CDNA FLJ43077 fis. clone BRTHA3015910                                                                                                | 5.74E+07                                                                | 5.66E+08     | 0.99                                               | 4.59E+07                                                    | 6.01E+08     | <b>1.12</b>                                        |
| IPI00788073                                   | similar to Huntingtin-interacting protein 1-related protein                                                                          | 1.81E+04                                                                | 1.69E+05     | 0.97                                               | 1.12E+04                                                    | 2.33E+05     | <b>1.32</b>                                        |
| IPI00411412                                   | similar to autism susceptibility candidate 2                                                                                         | 5.92E+05                                                                | 5.35E+06     | 0.96                                               | 4.84E+05                                                    | 6.76E+06     | <b>1.15</b>                                        |
| IPI00003843                                   | Isoform A1 of Tight junction protein ZO-2                                                                                            | 8.24E+05                                                                | 6.96E+06     | 0.93                                               | 7.73E+05                                                    | 6.82E+06     | <b>0.95</b>                                        |
| IPI00786919                                   | similar to Trichohyalin                                                                                                              | 1.80E+06                                                                | 1.50E+07     | 0.92                                               | 1.56E+06                                                    | 1.81E+07     | <b>1.06</b>                                        |
| IPI00183794                                   | zinc finger protein 265 isoform 2                                                                                                    | 2.88E+04                                                                | 2.26E+05     | 0.89                                               | 2.70E+04                                                    | 2.18E+05     | <b>0.91</b>                                        |
| IPI00418240                                   | LIM-nebulette                                                                                                                        | 1.81E+06                                                                | 1.26E+07     | 0.84                                               | 1.49E+06                                                    | 1.45E+07     | <b>0.99</b>                                        |
| IPI00022799                                   | Isoform 2 of Aquaporin-4                                                                                                             | 1.26E+07                                                                | 8.35E+07     | 0.82                                               | 1.13E+07                                                    | 9.30E+07     | <b>0.92</b>                                        |
| IPI00787414                                   | hypothetical protein LOC284069                                                                                                       | 6.11E+05                                                                | 3.95E+06     | 0.81                                               | 5.32E+05                                                    | 4.27E+06     | <b>0.90</b>                                        |
| IPI00297859                                   | Isoform 1 of Myeloid/lymphoid or mixed-lineage leukemia protein 2                                                                    | 1.68E+07                                                                | 1.05E+08     | 0.80                                               | 1.53E+07                                                    | 1.28E+08     | <b>0.92</b>                                        |
| IPI00014253                                   | Ribosome biogenesis regulatory protein homolog                                                                                       | 6.34E+05                                                                | 3.95E+06     | 0.79                                               | 5.21E+05                                                    | 3.44E+06     | <b>0.82</b>                                        |
| IPI00218848                                   | ATP synthase, H+ transporting, mitochondrial F0 complex, subunit e                                                                   | 1.86E+06                                                                | 1.16E+07     | 0.79                                               | 1.80E+06                                                    | 1.09E+07     | <b>0.78</b>                                        |
| IPI00013788                                   | HIV Tat-specific factor 1                                                                                                            | 1.14E+05                                                                | 6.70E+05     | 0.77                                               | 9.61E+04                                                    | 7.58E+05     | <b>0.90</b>                                        |
| IPI00008223                                   | UV excision repair protein RAD23 homolog B                                                                                           | 1.04E+06                                                                | 6.04E+06     | 0.76                                               | 9.36E+05                                                    | 7.10E+06     | <b>0.88</b>                                        |
| IPI00218831                                   | Glutathione S-transferase Mu 1                                                                                                       | 7.12E+06                                                                | 4.05E+07     | 0.75                                               | 5.51E+06                                                    | 4.64E+07     | <b>0.93</b>                                        |
| IPI00784338                                   | Similar to APOA4 protein                                                                                                             | 4.55E+05                                                                | 2.58E+06     | 0.75                                               | 4.16E+05                                                    | 2.44E+06     | <b>0.77</b>                                        |
| IPI00008575                                   | Isoform 1 of KH domain-containing, RNA-binding, signal transduction-associated protein                                               | 4.73E+05                                                                | 2.59E+06     | 0.74                                               | 4.74E+05                                                    | 3.54E+06     | <b>0.87</b>                                        |
| IPI00435935                                   | PP11647                                                                                                                              | 1.53E+06                                                                | 7.98E+06     | 0.72                                               | 1.27E+06                                                    | 1.06E+07     | <b>0.92</b>                                        |
| IPI00006854                                   | Ras GTPase-activating protein nGAP                                                                                                   | 9.02E+04                                                                | 4.59E+05     | 0.71                                               | 7.19E+04                                                    | 5.78E+05     | <b>0.90</b>                                        |
| IPI00295469                                   | Copine-6                                                                                                                             | 4.28E+05                                                                | 2.16E+06     | 0.70                                               | 4.27E+05                                                    | 2.48E+06     | <b>0.76</b>                                        |
| IPI00219622                                   | Proteasome subunit alpha type 2                                                                                                      | 1.48E+05                                                                | 7.42E+05     | 0.70                                               | 1.47E+05                                                    | 9.07E+05     | <b>0.79</b>                                        |
| IPI00292657                                   | NADP-dependent leukotriene B4 12-hydroxydehydrogenase                                                                                | 4.79E+05                                                                | 2.35E+06     | 0.69                                               | 4.53E+05                                                    | 2.29E+06     | <b>0.70</b>                                        |
| IPI00746388                                   | Ezrin                                                                                                                                | 1.35E+08                                                                | 6.50E+08     | 0.68                                               | 1.30E+08                                                    | 7.64E+08     | <b>0.77</b>                                        |
| IPI00217914                                   | Uncharacterized protein C6orf182                                                                                                     | 4.16E+06                                                                | 1.99E+07     | 0.68                                               | 4.03E+06                                                    | 2.44E+07     | <b>0.78</b>                                        |
| IPI00157414                                   | Ectonucleotide pyrophosphatase/phosphodiesterase 6 precursor<br>Bifunctional methylenetetrahydrofolate dehydrogenase/cyclohydrolase. | 4.36E+04                                                                | 2.07E+05     | 0.68                                               | 2.71E+04                                                    | 2.79E+05     | <b>1.01</b>                                        |
| IPI00011307                                   | mitochondrial prec                                                                                                                   | 3.10E+05                                                                | 1.46E+06     | 0.67                                               | 2.43E+05                                                    | 1.40E+06     | <b>0.76</b>                                        |
| IPI00430411                                   | Calcium/calmodulin-dependent protein kinase type IV                                                                                  | 2.26E+06                                                                | 9.90E+06     | 0.64                                               | 2.24E+06                                                    | 7.98E+06     | <b>0.55</b>                                        |
| IPI00329488                                   | Isoform 1B of Tyrosine-protein kinase ABL2                                                                                           | 1.96E+06                                                                | 8.42E+06     | 0.63                                               | 1.69E+06                                                    | 9.54E+06     | <b>0.75</b>                                        |
| IPI00004502                                   | CDNA FLJ20330 fis. clone HEP10296                                                                                                    | 8.02E+06                                                                | 3.39E+07     | 0.63                                               | 7.16E+06                                                    | 2.64E+07     | <b>0.57</b>                                        |
| IPI00737307                                   | similar to paraneoplastic antigen MA3                                                                                                | 9.49E+06                                                                | 3.92E+07     | 0.62                                               | 9.40E+06                                                    | 4.12E+07     | <b>0.64</b>                                        |
| IPI00413641                                   | Aldose reductase                                                                                                                     | 1.41E+07                                                                | 5.80E+07     | 0.61                                               | 1.40E+07                                                    | 6.08E+07     | <b>0.64</b>                                        |
| IPI00219067                                   | Glutathione S-transferase Mu 2                                                                                                       | 2.22E+07                                                                | 9.09E+07     | 0.61                                               | 1.88E+07                                                    | 1.04E+08     | <b>0.74</b>                                        |
| IPI00025512                                   | Heat-shock protein beta-1                                                                                                            | 2.43E+07                                                                | 9.90E+07     | 0.61                                               | 2.16E+07                                                    | 1.07E+08     | <b>0.69</b>                                        |
| IPI00003799                                   | Isoform 2 of Heme-binding protein 2                                                                                                  | 3.59E+05                                                                | 1.46E+06     | 0.61                                               | 3.06E+05                                                    | 1.79E+06     | <b>0.77</b>                                        |
| IPI00009030                                   | Isoform LAMP-2A of Lysosome-associated membrane glycoprotein 2 precursor                                                             | 6.91E+06                                                                | 2.81E+07     | 0.61                                               | 6.01E+06                                                    | 2.56E+07     | <b>0.63</b>                                        |
| IPI00031070                                   | SCR1 protein                                                                                                                         | 1.72E+06                                                                | 6.95E+06     | 0.61                                               | 1.67E+06                                                    | 7.08E+06     | <b>0.63</b>                                        |
| IPI00646304                                   | peptidylprolyl isomerase B precursor                                                                                                 | 1.43E+08                                                                | 5.70E+08     | 0.60                                               | 1.38E+08                                                    | 6.38E+08     | <b>0.66</b>                                        |
| IPI00012303                                   | Selenium-binding protein 1                                                                                                           | 8.18E+05                                                                | 3.23E+06     | 0.60                                               | 7.93E+05                                                    | 3.60E+06     | <b>0.66</b>                                        |
| IPI00816217                                   | Isoform 2 of Structural maintenance of chromosomes protein 6                                                                         | 2.57E+05                                                                | 9.87E+05     | 0.58                                               | 1.98E+05                                                    | 1.09E+06     | <b>0.74</b>                                        |
| IPI00024993                                   | Enoyl-CoA hydratase, mitochondrial precursor                                                                                         | 7.14E+06                                                                | 2.73E+07     | 0.58                                               | 6.30E+06                                                    | 3.17E+07     | <b>0.70</b>                                        |

|                                                 |                                                                                       |          |          |       |          |          |       |
|-------------------------------------------------|---------------------------------------------------------------------------------------|----------|----------|-------|----------|----------|-------|
| IPI00642432                                     | Glutathione S-transferase M5                                                          | 1.49E+06 | 5.69E+06 | 0.58  | 1.21E+06 | 6.56E+06 | 0.73  |
| IPI00796704                                     | 11 kDa protein                                                                        | 1.84E+07 | 7.00E+07 | 0.58  | 1.85E+07 | 7.08E+07 | 0.58  |
| IPI00441187                                     | MGAT5B protein                                                                        | 1.47E+06 | 5.50E+06 | 0.57  | 1.30E+06 | 5.99E+06 | 0.66  |
| IPI00097257                                     | Uncharacterized protein C20orf152                                                     | 3.84E+05 | 1.41E+06 | 0.57  | 3.20E+05 | 1.64E+06 | 0.71  |
| IPI00013174                                     | Isoform 1 of RNA-binding protein 14                                                   | 4.15E+05 | 1.51E+06 | 0.56  | 3.69E+05 | 1.66E+06 | 0.65  |
| IPI00012382                                     | U1 small nuclear ribonucleoprotein A                                                  | 3.38E+06 | 1.22E+07 | 0.56  | 2.61E+06 | 1.44E+07 | 0.74  |
| IPI00062599                                     | Isoform 1 of SWI/SNF-related matrix-associated actin-dependent regulator of chromatin | 1.83E+06 | 6.62E+06 | 0.56  | 1.54E+06 | 7.66E+06 | 0.70  |
| IPI00003377                                     | Isoform 1 of Splicing factor, arginine/serine-rich 7                                  | 1.15E+07 | 4.06E+07 | 0.55  | 1.15E+07 | 3.71E+07 | 0.51  |
| IPI00396243                                     | Isoform 1 of WD repeat protein 19                                                     | 1.31E+06 | 4.54E+06 | 0.54  | 1.20E+06 | 4.50E+06 | 0.57  |
| IPI00031411                                     | Cadherin-related tumor suppressor homolog precursor                                   | 1.65E+05 | 5.62E+05 | 0.53  | 1.27E+05 | 4.34E+05 | 0.53  |
| IPI00783082                                     | Isoform 1 of tRNA isopentenyltransferase, mitochondrial precursor                     | 5.85E+06 | 1.98E+07 | 0.53  | 5.15E+06 | 1.79E+07 | 0.54  |
| IPI00386444                                     | Isoform 1 of Nesprin-1                                                                | 1.75E+07 | 5.89E+07 | 0.53  | 1.66E+07 | 6.54E+07 | 0.60  |
| IPI00102118                                     | MLX interacting protein                                                               | 2.06E+05 | 6.91E+05 | 0.53  | 1.85E+05 | 7.59E+05 | 0.61  |
| IPI00215918                                     | ADP-ribosylation factor 4                                                             | 5.19E+07 | 1.72E+08 | 0.52  | 5.00E+07 | 1.83E+08 | 0.56  |
| IPI00411743                                     | CCDC15 protein (Fragment)                                                             | 6.73E+06 | 2.23E+07 | 0.52  | 6.48E+06 | 1.98E+07 | 0.48  |
| IPI00290553                                     | 10-formyltetrahydrofolate dehydrogenase                                               | 4.13E+07 | 1.36E+08 | 0.52  | 3.68E+07 | 1.60E+08 | 0.64  |
| IPI00783455                                     | G2                                                                                    | 1.33E+07 | 4.30E+07 | 0.51  | 1.17E+07 | 4.29E+07 | 0.56  |
| IPI00782981                                     | Isoform 1 of ATP-binding cassette sub-family A member 12                              | 3.51E+06 | 1.13E+07 | 0.51  | 3.04E+06 | 1.09E+07 | 0.56  |
| IPI00015351                                     | AD039                                                                                 | 3.82E+06 | 1.21E+07 | 0.50  | 3.10E+06 | 1.61E+07 | 0.72  |
| IPI00293655                                     | ATP-dependent RNA helicase DDX1                                                       | 2.48E+06 | 7.83E+06 | 0.50  | 2.06E+06 | 6.49E+06 | 0.50  |
| IPI00787639                                     | similar to centaurin, gamma-like family, member 1 isoform 1                           | 1.31E+07 | 4.09E+07 | 0.50  | 1.02E+07 | 4.76E+07 | 0.67  |
| IPI00009104                                     | RuvB-like 2                                                                           | 3.70E+06 | 1.15E+07 | 0.49  | 3.19E+06 | 1.05E+07 | 0.52  |
| IPI00220301                                     | Peroxisredoxin-6                                                                      | 2.74E+08 | 8.34E+08 | 0.48  | 2.28E+08 | 9.03E+08 | 0.60  |
| IPI00022429                                     | Alpha-1-acid glycoprotein 1 precursor                                                 | 2.33E+06 | 7.04E+06 | 0.48  | 2.07E+06 | 8.47E+06 | 0.61  |
| <b>PROTEINS DOWN REGULATED IN SCA23 SUBJECT</b> |                                                                                       |          |          |       |          |          |       |
| IPI00023780                                     | Isoform 2 of Dnaj homolog subfamily C member 5                                        | 7.29E+06 | 2.43E+06 | -0.48 | 6.71E+06 | 1.72E+06 | -0.59 |
| IPI00760924                                     | Isoform 2 of Rho GTPase-activating protein 18                                         | 5.53E+06 | 1.81E+06 | -0.49 | 5.39E+06 | 1.58E+06 | -0.53 |
| IPI00016837                                     | GRID2 protein                                                                         | 1.73E+07 | 5.30E+06 | -0.51 | 1.61E+07 | 3.57E+06 | -0.65 |
| IPI00743456                                     | G protein-coupled receptor 124                                                        | 6.47E+07 | 1.97E+07 | -0.52 | 6.10E+07 | 1.72E+07 | -0.55 |
| IPI00383598                                     | Cytochrome C oxidase subunit VIa homolog                                              | 5.46E+06 | 1.57E+06 | -0.54 | 5.46E+06 | 1.65E+06 | -0.52 |
| IPI00402145                                     | similar to CG10671-like                                                               | 1.03E+07 | 2.97E+06 | -0.54 | 9.21E+06 | 2.30E+06 | -0.60 |
| IPI00018768                                     | Translin                                                                              | 4.29E+06 | 1.22E+06 | -0.55 | 4.03E+06 | 1.35E+06 | -0.48 |
| IPI00063903                                     | Up-regulated during skeletal muscle growth protein 5                                  | 2.72E+07 | 7.70E+06 | -0.55 | 2.47E+07 | 7.38E+06 | -0.52 |
| IPI00718942                                     | dipeptidyl-peptidase 6 isoform 2                                                      | 8.18E+06 | 2.31E+06 | -0.55 | 7.93E+06 | 2.14E+06 | -0.57 |
| IPI00000041                                     | Rho-related GTP-binding protein RhoB precursor                                        | 1.96E+07 | 5.23E+06 | -0.57 | 1.89E+07 | 4.42E+06 | -0.63 |
| IPI00220993                                     | Isoform CNPI of 2',3'-cyclic-nucleotide 3'-phosphodiesterase                          | 7.85E+08 | 2.08E+08 | -0.58 | 6.93E+08 | 1.77E+08 | -0.59 |
| IPI00386258                                     | Isoform 1 of Mitochondrial carrier homolog 1                                          | 2.94E+06 | 7.59E+05 | -0.59 | 2.40E+06 | 7.35E+05 | -0.51 |
| IPI00473011                                     | Hemoglobin subunit delta                                                              | 7.82E+07 | 2.00E+07 | -0.59 | 7.80E+07 | 1.83E+07 | -0.63 |
| IPI00478296                                     | OTTHUMP0000031447                                                                     | 2.09E+06 | 5.27E+05 | -0.60 | 1.79E+06 | 5.35E+05 | -0.52 |
| IPI00009688                                     | Phosphatidylinositol-4-phosphate 5-kinase type-2 alpha                                | 1.67E+06 | 4.06E+05 | -0.61 | 1.29E+06 | 4.21E+05 | -0.48 |
| IPI00028509                                     | Guanine nucleotide-binding protein G(I)/G(S)/G(O) gamma-7 subunit precursor           | 5.10E+07 | 1.22E+07 | -0.62 | 4.39E+07 | 1.02E+07 | -0.63 |
| IPI00169259                                     | Small VCP/p97-interacting protein                                                     | 1.07E+07 | 2.51E+06 | -0.63 | 9.44E+06 | 2.80E+06 | -0.53 |
| IPI00647009                                     | OTTHUMP00000017655                                                                    | 9.44E+07 | 2.21E+07 | -0.63 | 9.39E+07 | 1.81E+07 | -0.72 |
| IPI00478968                                     | Sec23 homolog B                                                                       | 2.80E+07 | 6.48E+06 | -0.64 | 2.46E+07 | 6.58E+06 | -0.57 |
| IPI00031697                                     | Transmembrane protein 109 precursor                                                   | 7.01E+06 | 1.60E+06 | -0.64 | 5.84E+06 | 1.66E+06 | -0.55 |
| IPI00026846                                     | Sodium- and chloride-dependent GABA transporter 1                                     | 3.49E+06 | 7.49E+05 | -0.67 | 2.85E+06 | 7.88E+05 | -0.56 |
| IPI00239406                                     | Isoform 2 of Nesprin-2                                                                | 1.82E+07 | 3.90E+06 | -0.67 | 1.61E+07 | 3.07E+06 | -0.72 |
| IPI00025142                                     | immunoglobulin superfamily, member 6                                                  | 2.53E+07 | 5.25E+06 | -0.68 | 2.34E+07 | 6.70E+06 | -0.54 |
| IPI00000581                                     | Hypothetical protein DKFZp564E242                                                     | 9.30E+06 | 1.87E+06 | -0.70 | 8.16E+06 | 1.85E+06 | -0.64 |
| IPI00215997                                     | CD9 antigen                                                                           | 6.11E+07 | 1.23E+07 | -0.70 | 6.11E+07 | 1.00E+07 | -0.79 |
| IPI00017510                                     | Cytochrome c oxidase subunit 2                                                        | 1.82E+07 | 3.54E+06 | -0.71 | 1.28E+07 | 3.00E+06 | -0.63 |
| IPI00394876                                     | basigin isoform 3                                                                     | 3.69E+08 | 6.90E+07 | -0.73 | 3.56E+08 | 7.21E+07 | -0.69 |
| IPI00787193                                     | similar to Golgin subfamily A member 2                                                | 4.33E+05 | 7.74E+04 | -0.75 | 4.31E+05 | 8.65E+04 | -0.70 |
| IPI00291607                                     | Inositol 1,4,5-trisphosphate receptor type 3                                          | 2.89E+06 | 5.16E+05 | -0.75 | 2.46E+06 | 3.96E+05 | -0.79 |
| IPI00173461                                     | Junctophilin-1                                                                        | 1.00E+06 | 1.73E+05 | -0.76 | 9.63E+05 | 1.12E+05 | -0.93 |
| IPI00305865                                     | LOC348174 protein (Fragment)                                                          | 7.09E+06 | 1.21E+06 | -0.77 | 5.49E+06 | 1.35E+06 | -0.61 |
| IPI00444262                                     | CDNA FLJ45706 fis. clone FEBRA2028457, highly similar to Nucleolin                    | 9.32E+08 | 1.59E+08 | -0.77 | 8.35E+08 | 1.68E+08 | -0.70 |
| IPI00187000                                     | CDNA FLJ38262 fis. clone FCBBF3001594, moderately similar to Chlamydomonas            | 7.99E+06 | 1.35E+06 | -0.77 | 6.97E+06 | 1.50E+06 | -0.67 |

|             |                                                              |          |          |       |          |          |       |
|-------------|--------------------------------------------------------------|----------|----------|-------|----------|----------|-------|
| IP100026237 | reinhardtii                                                  |          |          |       |          |          |       |
| IP100018934 | Myelin-associated glycoprotein precursor                     | 5.34E+06 | 8.60E+05 | -0.79 | 5.31E+06 | 9.63E+05 | -0.74 |
| IP100000949 | Isoform 1 of Sodium channel protein type 1 subunit alpha     | 6.87E+04 | 1.06E+04 | -0.81 | 6.04E+04 | 5.65E+03 | -1.03 |
| IP100014068 | Mu-crystallin homolog                                        | 8.71E+08 | 1.29E+08 | -0.83 | 8.06E+08 | 1.49E+08 | -0.73 |
| IP100010766 | Isoform 1 of Serine/threonine-protein kinase PAK 4           | 3.41E+06 | 4.89E+05 | -0.84 | 3.42E+06 | 6.59E+05 | -0.71 |
| IP100021841 | Excitatory amino acid transporter 4 (EAAT4)                  | 7.14E+07 | 8.64E+06 | -0.92 | 6.06E+07 | 1.16E+07 | -0.72 |
| IP100550206 | Apolipoprotein A-I precursor                                 | 5.42E+07 | 6.16E+06 | -0.94 | 4.84E+07 | 5.58E+06 | -0.94 |
| IP100304809 | Zinc finger protein 576                                      | 8.03E+06 | 8.69E+05 | -0.97 | 6.07E+06 | 9.18E+05 | -0.82 |
| IP100007812 | hypothetical protein LOC23281 isoform a                      | 5.53E+05 | 5.94E+04 | -0.97 | 5.33E+05 | 5.86E+04 | -0.96 |
| IP100179109 | Vacuolar ATP synthase subunit B, brain isoform               | 7.28E+08 | 7.80E+07 | -0.97 | 6.17E+08 | 7.90E+07 | -0.89 |
| IP100032485 | Isoform 1 of NAD-dependent deacetylase sirtuin-2             | 2.55E+07 | 2.66E+06 | -0.98 | 2.15E+07 | 3.02E+06 | -0.85 |
| IP100657720 | Plasmolipin                                                  | 1.03E+06 | 1.02E+05 | -1.00 | 1.03E+06 | 7.15E+04 | -1.16 |
| IP100000779 | Protein                                                      | 3.68E+06 | 3.39E+05 | -1.04 | 2.87E+06 | 4.33E+05 | -0.82 |
| IP100790000 | Isoform 1 of ADAM 22 precursor                               | 5.14E+06 | 4.27E+05 | -1.08 | 4.53E+06 | 2.67E+05 | -1.23 |
| IP100017530 | 54 kDa protein                                               | 6.64E+05 | 4.39E+04 | -1.18 | 5.26E+05 | 5.11E+04 | -1.01 |
| IP100410163 | Ficolin-2 precursor                                          | 1.87E+06 | 1.20E+05 | -1.19 | 1.47E+06 | 1.71E+05 | -0.93 |
| IP100402501 | Isoform 1 of WD repeat protein 78                            | 6.01E+06 | 3.55E+05 | -1.23 | 5.18E+06 | 3.13E+05 | -1.22 |
| IP100008896 | CDNA FLJ32731 fis. clone TEST12001134                        | 4.12E+06 | 2.22E+05 | -1.27 | 4.11E+06 | 2.50E+05 | -1.22 |
| IP100021907 | Palmitoyltransferase ZDHC2                                   | 6.71E+06 | 3.17E+05 | -1.33 | 5.87E+06 | 3.63E+05 | -1.21 |
| IP100556079 | Isoform 1 of Myelin basic protein                            | 1.02E+09 | 4.26E+07 | -1.38 | 8.96E+08 | 5.34E+07 | -1.23 |
| IP100386849 | Isoform 1 of Myelin-oligodendrocyte glycoprotein precursor   | 1.15E+08 | 4.35E+06 | -1.42 | 1.03E+08 | 3.26E+06 | -1.50 |
| IP100746412 | KIAA1812 protein (Fragment)                                  | 6.36E+05 | 2.18E+04 | -1.46 | 5.83E+05 | 2.01E+04 | -1.46 |
| IP100099834 | splicing factor, arginine/serine-rich 2, interacting protein | 5.15E+06 | 1.58E+05 | -1.51 | 4.38E+06 | 1.78E+05 | -1.39 |
| IP100183002 | Ubiquitin                                                    | 2.50E+06 | 5.67E+04 | -1.64 | 2.39E+06 | 5.60E+04 | -1.63 |
| IP100219661 | Isoform 1 of Protein phosphatase 1 regulatory subunit 12A    | 1.21E+05 | 2.01E+03 | -1.78 | 1.21E+05 | 2.54E+03 | -1.68 |
| IP100026337 | proteolipid protein 1 isoform 1                              | 3.43E+09 | 4.88E+07 | -1.85 | 2.85E+09 | 4.82E+07 | -1.77 |
|             | Isoform 1 of Ran-binding protein 3                           | 1.14E+09 | 6.39E+06 | -2.25 | 9.62E+08 | 7.67E+06 | -2.10 |

Two aliquots of SCA23 sample were processed and each analyzed by LC-MS/MS with three technical replicates; two aliquots of each of three control samples were processed and each analyzed by LC-MS/MS. Protein amounts were normalized to (1) the sum of quantified protein intensities, and to (2) the total protein load. Averaging of protein intensities was done by calculating median values for 6 replicates of SCA23 and controls. A protein was considered to be up- or downregulated if its intensity differed between SCA23 and controls more than 3-fold ( $[\text{ABS}(\log_{10}(\text{ratio of median of affected sample to median of controls})) > 0.47]$ ).

**Table S5. Key Protein Signaling Molecules (Key-Nodes) Affected in SCA23 Cerebellum**

| <i>Key Node</i>                              | <i>Average Score, SCA23</i> | <i>Average Score, Controls</i> | <i>Delta Score</i> | <i>Pathway / Function</i>                                                                                                       | <i>Ref</i> |
|----------------------------------------------|-----------------------------|--------------------------------|--------------------|---------------------------------------------------------------------------------------------------------------------------------|------------|
| Aspartate transaminase                       | 37709.14                    | 26108.94                       | 11600.20           | Key enzyme in glutamate cycling in brain                                                                                        | 1          |
| Pyruvate dehydrogenase (acetyl-transferring) | 43482.71                    | 31966.66                       | 11516.05           | Enzyme defects may cause neurodegenerative disorder with lesions in brain areas including cerebellum                            | 2          |
| Phosphopyruvate hydratase /enolase           | 37797.45                    | 28086.55                       | 9710.90            | Has neurotrophic and neuro-protective properties; levels increased in cerebral trauma                                           | 3          |
| YAP                                          | 25532.72                    | 17317.41                       | 8215.31            | 65 kDa Yes-associated protein 1, a transcriptional activator; acts in apoptosis, regulation of cell proliferation and migration | 4          |
| PAK3                                         | 3073.33                     | 10026.54                       | -6953.21           | Serine/threonine-protein kinase; defects in PAC3 cause of mental retardation                                                    | 5          |
| Aldolases EC 4.1.2.13                        | 30554.61                    | 39642.10                       | -9087.49           | Strongly expressed in a subset of cerebellar Purkinje cells                                                                     | 6          |
| PRK1                                         | 2970.80                     | 12668.41                       | -9697.61           | Serine/threonine-protein kinase N1                                                                                              | 7          |
| KIS                                          | 5802.18                     | 16776.34                       | -10974.16          | Serine/threonine-protein kinase Kist                                                                                            | 8          |
| ATPase alpha                                 | 21341.43                    | 45947.15                       | -24605.72          | Catalyzes ATP hydrolysis coupled with the exchange of sodium and potassium ions across the plasma membrane                      | 9          |

A total of 419 key-node molecules were presented in ExPlain™ 2.4.1 output list (corresponding to 1-21 distance setting). The average score for each key-node molecule in the SCA23 and control sets, and the difference Delta in scores between SCA23 and controls (Delta score) were calculated. The standard deviation ( $\sigma$ ) for Delta score values was 2258. Key-node molecules with absolute Delta score exceeded  $3\sigma$ , i.e. 6774, were considered as affected and shown in the table.

#### References

1. Malthankar-Phatak GH, de Lanerolle N, Eid T, Spencer DD, Behar KL, Spencer SS, Kim JH, Lai JC. Differential glutamate dehydrogenase (GDH) activity profile in patients with temporal lobe epilepsy. *Epilepsia*. 2006 Aug;47(8):1292-9.
2. <http://www.genecards.org/cgi-bin/carddisp.pl?gene=Pdha1>
3. <http://www.uniprot.org/uniprot/P09104>
4. Danovi SA, Rossi M, Gudmundsdottir K, Yuan M, Melino G, Basu S. Yes-associated protein (YAP) is a critical mediator of c-Jun-dependent apoptosis. *Cell Death Differ*. 2008 Jan;15(1):217-9.
5. <http://www.uniprot.org/uniprot/O75914>
6. G. Brochu, L. Maler and R. Hawkes, Zebrin II: a polypeptide antigen expressed selectively by Purkinje cells reveals compartments in rat and fish cerebellum. *J Comp Neurol* 291 (1990), pp. 538–552.
7. <http://www.uniprot.org/uniprot/Q16512>
8. <http://www.uniprot.org/uniprot/Q8TAS1>
9. Chauhan N, Siegel G. Differential expression of Na,K-ATPase alpha-isoform mRNAs in aging rat cerebellum. *J Neurosci Res*. (1997) Feb 1;47(3):287-99.



**Table S6. Demographic Data of SCA23 and Control Subjects, Whose Postmortem Specimens Were Used for Molecular and Biochemical Analysis**

| Subject ID | Disease                  | Cause of Death                 | Postmortem Interval in Hours |           | Age at Death (Years) | Brain pH |
|------------|--------------------------|--------------------------------|------------------------------|-----------|----------------------|----------|
|            |                          |                                | Warm Time                    | Cold Time |                      |          |
| 96S237     | cerebellar ataxia, SCA23 | dehydration, aspiration        | 5.0                          | 0         | 80                   | NA       |
| 94S79      | cardiovascular disease   | bronchopneumonia               | 4.0                          | 0         | 68                   | NA       |
| ND081      | none                     | multiple injuries, ACC         | 4.2                          | 34.5      | 53                   | 6.75     |
| ND083      | asthma, hypertension     | spontaneous SAB                | 10.9                         | 39.1      | 58                   | 7.00     |
| ND099      | depression               | intoxication with propoxyphene | 9.8                          | 18.2      | 61                   | 6.52     |

SAB subarachnoid hemorrhage; ACC accidental death; NA not analyzed

**Table S7. PDYN Primer Sequences and PCR Conditions for Mutation Screening**

| Exons | Sequence (5'->3')             | Ta | Mg | Size (bp) |
|-------|-------------------------------|----|----|-----------|
| 3     | Forward: GCTGTGGGCAGGAGTTAGAG | 60 | 1  | 397       |
|       | Reverse: GCCATCTATAGGGCAGGACA |    |    |           |
| 4-1   | Forward: TAGCAGTGGCGTTCATTTTG | 56 | 1  | 545       |
|       | Reverse: TCTGAGCTCCTCTTGGGGTA |    |    |           |
| 4-2   | Forward: GGCACACTCTATCTCGCTGA | 56 | 1  | 484       |
|       | Reverse: ACCCTTCCCCATCACAGAC  |    |    |           |

Ta annealing temperature (°C); Mg MgCl<sub>2</sub> (mM)

**Table S8. Mutagenesis Primers to Introduce Mutations in PDYN cDNA**

| Mutation | Sequence (5'->3')                          |
|----------|--------------------------------------------|
| p.R138S  | Forward: CTCTGACGGGTTTAGTGAGGGAGCAGAGTCT   |
|          | Reverse: AGACTCTGCTCCCTCACTAAACCCGTCAGAG   |
| p.L211S  | Forward: CTATGGGGGCTTCTCGCGGCGCATTCGTC     |
|          | Reverse: GACGAATGCGCCGCGAGAAGCCCCCATAG     |
| p.R212W  | Forward: TATGGGGGCTTCTTGTGGCGCATTCGTCCCAAG |
|          | Reverse: TTGGGACGAATGCGCCACAAGAAGCCCCCATAG |
| p.R215C  | Forward: CTTGCGGCGCATTTGTCCCAAGCTCAAG      |
|          | Reverse: CTTGAGCTTGGGACAAATGCGCCGCAAG      |
